# Supplementary figures and images for: ArF laser photolysis of gaseous CS2–(CH3)4Sn mixtures: gas-phase reaction between tin and sulfur and deposition of nanosized tin sulfides incorporated in a polymer network
Source: Royal Society of Chemistry journal article supplement (doi:10.1039/b418758j), 2005-01-01

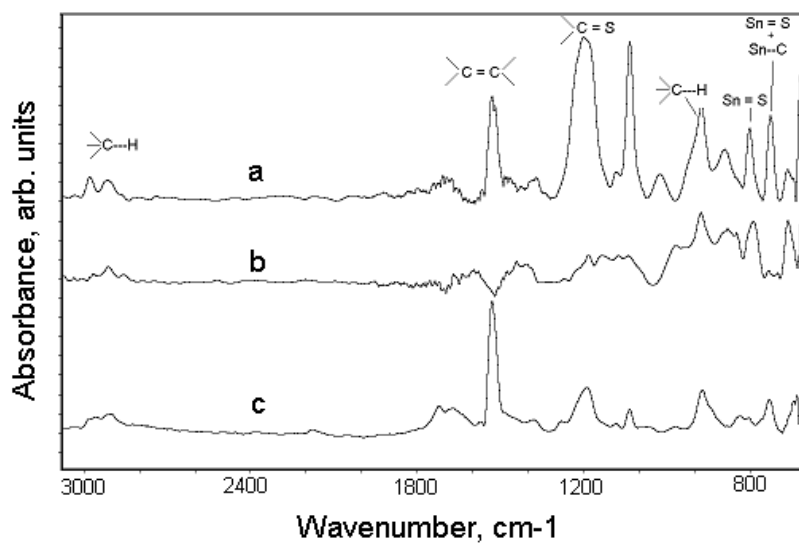

FTIR spectra of the deposits (a-c) obtained at respective conditions A, B and C (Table 1).

Supplement: b418758j.pdf [file b418758j.pdf]
